# Supplementary material for: Clinical efficacy of early loading versus conventional loading of dental implants
Source: PubMed Central journal article supplement (PMC4635353; doi:10.1038/srep15995), 2015-11-06
Supplement: srep15995-s1.pdf [file srep15995-s1.pdf]

# **Clinical efficacy of early loading versus conventional loading of dental implants**

Yanfei Zhu<sup>1#</sup>, Xinyi Zheng<sup>1#</sup>, Guanqi Zeng<sup>1</sup>, Yi Xu<sup>1</sup>, Xinhua Qu<sup>2\*</sup>, Min Zhu<sup>3\*</sup>, Eryi Lu<sup>4\*</sup>

<sup>1</sup>College of Stomatology, Shanghai JiaoTong University School of Medicine, Shanghai, China; <sup>2</sup>Department of Orthopaedics, Shanghai Ninth People's Hospital, Shanghai JiaoTong University School of Medicine, Shanghai Key Laboratory of Orthopaedic Implant, Shanghai, China; <sup>3</sup>Department of Oral and Cranio-Maxillofacial Science, Shanghai Ninth People's Hospital, College of Stomatology, Shanghai Jiao Tong University School of Medicine, Shanghai Key Laboratory of Stomatology, Shanghai, China; <sup>4</sup>Department of Prosthodontics, Shanghai Ninth People's Hospital, College of Stomatology, Shanghai JiaoTong University School of Medicine, Shanghai, China.

#Yanfei Zhu and Xinyi Zheng contributed equally to this study.

\*Corresponding author: xinhua\_qu@126.com (X. Qu); zminnie@126.com (M. Zhu) ; lueryi222@126.com (E. Lu)

## Supplementary information

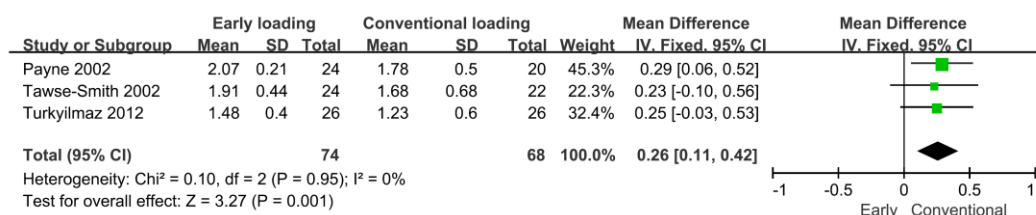

Figure S1. Forrest plots of the individual studies for probing pocket index.

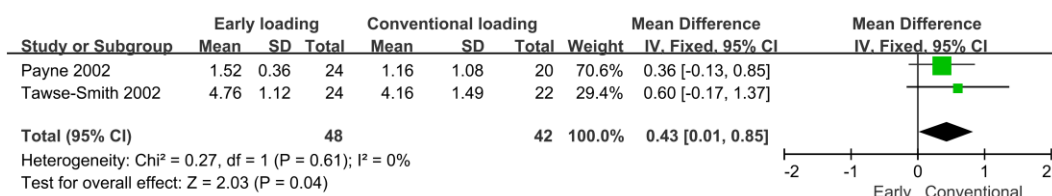

Figure S2. Forrest plots of the individual studies for the attachment level.

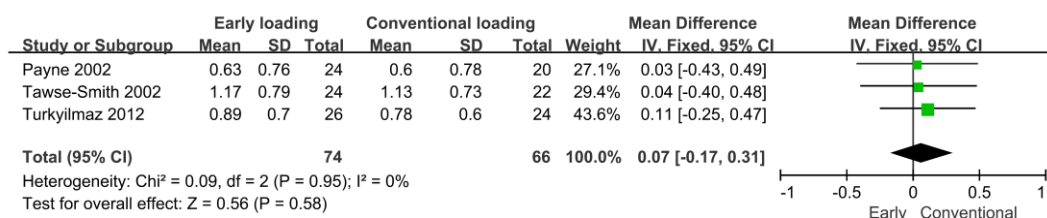

Figure S3. Forrest plots of the individual studies for the plaque index.

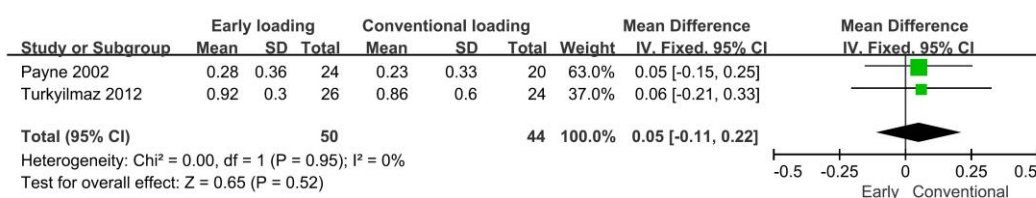

Figure S4. Forrest plots of the individual studies for the modified gingival index.

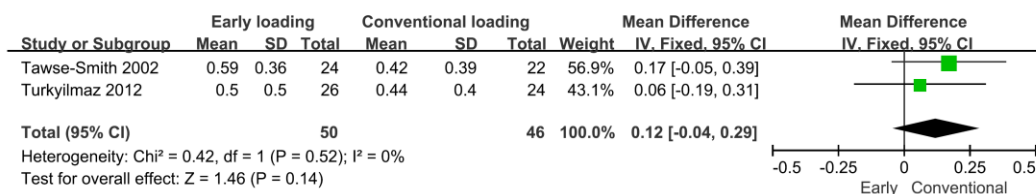

Figure S5. Forrest plots of the individual studies for the modified bleeding index.

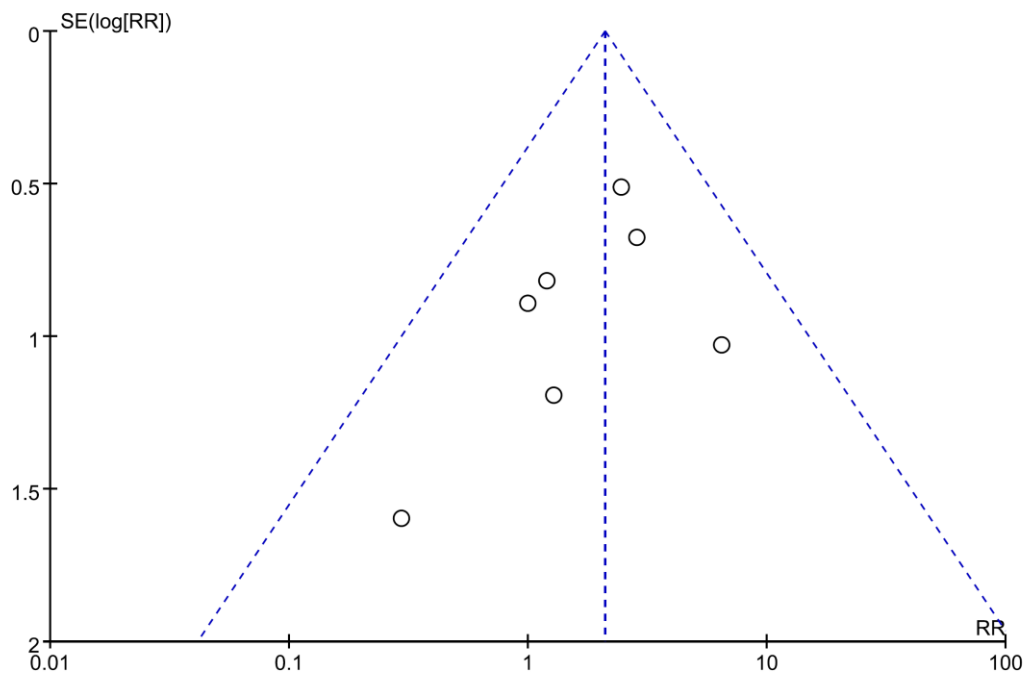

Figure S6. Funnel plot of the implant failure rates.

Table S1. Definition of group and prosthetic characteristics

| References         | Definition-test     | Definition-control | Extent of restoration | Position of implants | Type of restoration | Type of implants system                   |
|--------------------|---------------------|--------------------|-----------------------|----------------------|---------------------|-------------------------------------------|
| Anil (2012)        | 1 week              | 4 months           | Full-arch             | Mandible             | Removable           | Biohorizon Maestro                        |
| Barewal (2012)     | 6 weeks             | 3 months           | Single                | Mixed                | Fixed               | Astra Tech                                |
| De Smet (2007)     | 1 week              | 3~4 months         | Full-arch             | Mandible             | Removable           | Brånemark Novum                           |
| Ericsson (2000)    | 20 days             | 4 months           | Full-arch             | Mandible             | Fixed               | Brånemark MKII                            |
| Engquist(2005)     | 3 weeks             | 3 months           | Full-arch             | Mandible             | Fixed               | Brånemark MKIII                           |
| Eliasson (2009)    | 3 weeks             | 3 months           | Full-arch             | Mandible             | Fixed               | Brånemark, ITI, Astra Tech                |
| Fischer (2008)     | 9~18 days           | 2.5~5.1 months     | Full-arch             | Maxilla              | Fixed               | Straumann ITI                             |
| Ma (2010)          | 2 weeks&<br>6 weeks | 3 months           | Full-arch             | Mandible             | Removable           | Brånemark, Steri-Oss, Southern, Straumann |
| Payne (2002)       | 6 weeks             | 3 months           | Full-arch             | Mandible             | Removable           | Straumann ITI                             |
| Røynesdal (2001)   | 3 weeks             | 3 months           | Full-arch             | Mandible             | Removable           | Straumann ITI                             |
| Tawse-Smith (2002) | 6 weeks             | 3 months           | Full-arch             | Mandible             | Removable           | Steri-Oss, Southern                       |
| Turkyilmaz (2007a) | 6 weeks             | 3 months           | Single                | Maxilla              | Fixed               | Brånemark MKIII                           |
| Turkyilmaz (2007b) | 1 week              | 6 months           | Full-arch             | Mandible             | Removable           | Brånemark MKIII                           |
| Turkyilmaz (2012)  | 1 week              | 3 months           | Full-arch             | Mandible             | Removable           | Brånemark MKIII                           |

Table S2. Quality assessment of selected studies

| References         | Sequence Generation | Allocation Concealment | Blinding (single/double) | Clear definition | Free of selective reporting | Free of other bias | Risk of bias |
|--------------------|---------------------|------------------------|--------------------------|------------------|-----------------------------|--------------------|--------------|
| Anil (2012)        | NR                  | NR                     | NR                       | Yes              | Yes                         | Yes                | High         |
| Barewal (2012)     | Yes                 | Yes                    | Yes                      | Yes              | Yes                         | Yes                | Low          |
| De Smet (2007)     | No                  | NR                     | NR                       | Yes              | Yes                         | Yes                | High         |
| Ericsson (2000)    | NR                  | NR                     | NR                       | Yes              | Yes                         | Yes                | High         |
| Engquist (2005)    | NR                  | NR                     | NR                       | Yes              | Yes                         | Yes                | High         |
| Eliasson (2009)    | No                  | No                     | No                       | Yes              | Yes                         | No                 | High         |
| Fischer (2008)     | Yes                 | NR                     | NR                       | Yes              | Yes                         | Yes                | High         |
| Tawse-Smith (2002) | Yes                 | Yes                    | NR                       | Yes              | Yes                         | Yes                | Moderate     |
| Payne (2002)       | Yes                 | Yes                    | NR                       | Yes              | Yes                         | Yes                | Moderate     |
| Turkyilmaz (2012)  | Yes                 | NR                     | NR                       | Yes              | Yes                         | Yes                | High         |
| Turkyilmaz (2007a) | Yes                 | NR                     | NR                       | Yes              | Yes                         | Yes                | High         |
| Turkyilmaz (2007b) | Yes                 | NR                     | NR                       | Yes              | Yes                         | Yes                | High         |
| Ma (2010)          | Yes                 | Yes                    | NR                       | Yes              | Yes                         | Yes                | Moderate     |
| Røyndal (2001)     | NR                  | NR                     | NR                       | Yes              | Yes                         | Yes                | High         |

NR = not reported.
